# Supplementary material for: Effect of the orientation of nitro group on the electronic transport properties in single molecular field-effect transistors
Source: Royal Society of Chemistry journal article supplement (doi:10.1039/c2cp41480e), 2012-11-14
Supplement: c2cp41480e.pdf [file c2cp41480e.pdf]

## Effect of the orientation of nitro group on the electronic transport properties in single molecular field-effect transistors

Yuqing Xu,<sup>a</sup> Bin Cui,<sup>a</sup> Guomin Ji,<sup>a</sup> Dongmei Li,<sup>a</sup> and Desheng Liu<sup>\*ab</sup>

<sup>a</sup> School of Physics, State Key Laboratory of Crystal Materials, Shandong University, Jinan 250100, Peoples Republic of China.

<sup>b</sup> Department of Physics, Jining University, Qufu 273155, Peoples Republic of China.

\* Author to whom correspondence should be addressed. Electronic address: [liuds@sdu.edu.cn](mailto:liuds@sdu.edu.cn)

### Supplementary Information

#### Details of thermal average calculation

In Fig. 4, we plot the relative total energy of the free NO<sub>2</sub>BDT molecule as a function of twist angle  $\theta$ . Then we fit the curve to a harmonic oscillator potential for  $\theta$  ranging from 0° to 50°.

The amplitude of rotation can be written as the standard deviation of  $\theta$ ,

$$\sigma = \sqrt{\langle \theta^2 \rangle - \langle \theta \rangle^2},$$

where  $\langle \theta \rangle = \frac{\text{Tr}(e^{-H/kT} \theta)}{\text{Tr}(e^{-H/kT})}$  is the thermal average.

Hamiltonian of the harmonic oscillator is written as:

$$H = \frac{I\omega^2}{2} \theta^2 + \frac{1}{2I} L^2,$$

where  $I$  is the moment of inertia,  $\omega = \sqrt{\kappa/I}$  is the vibration frequency,  $L = I \frac{d\theta}{dt}$  is the angular momentum.

Introduce the raising and lowering operators:

$$\theta = \sqrt{\frac{\hbar}{2I\omega}} (b^+ + b), \quad L = i\sqrt{\frac{\hbar\omega I}{2}} (b^+ - b),$$

which satisfy the following commutation relations:

$$[b, b^+] = bb^+ - b^+b = 1 \quad \text{and} \quad [b, b] = [b^+, b^+] = 0.$$

Then we can obtain:

$$H = \hbar\omega(b^+b + \frac{1}{2}).$$

The eigen equation is:

$$H|n\rangle = E_n|n\rangle,$$

where  $|n\rangle$  is the eigenvector,  $E_n = \hbar\omega(n + \frac{1}{2})$  is the eigenvalue.

Therefore,

$$\begin{cases} \langle\theta\rangle = \frac{\text{Tr}(e^{-H/kT}\theta)}{\text{Tr}(e^{-H/kT})} = \frac{\sum_n \langle n|e^{-H/kT}\theta|n\rangle}{\sum_n \langle n|e^{-H/kT}|n\rangle}, \\ \langle\theta^2\rangle = \frac{\text{Tr}(e^{-H/kT}\theta^2)}{\text{Tr}(e^{-H/kT})} = \frac{\sum_n \langle n|e^{-H/kT}\theta^2|n\rangle}{\sum_n \langle n|e^{-H/kT}|n\rangle}. \end{cases}$$

Substitute  $\theta = \sqrt{\frac{\hbar}{2I\omega}}(b^+ + b)$  into the two equations above, and we can obtain:

$$\begin{cases} \langle\theta\rangle = 0, \\ \langle\theta^2\rangle = \frac{1}{I\omega^2}\langle H\rangle = \frac{1}{I\omega^2}\frac{\hbar\omega}{2}\coth(\frac{\hbar\omega}{2kT}). \end{cases}$$

When  $kT \gg \hbar\omega$ ,  $\langle\theta^2\rangle \approx \frac{kT}{I\omega^2} = \frac{kT}{\kappa}$ .

At room temperature ( $T=300\text{K}$ ),  $kT=25.86\text{meV}$ .  $\kappa$  can be obtained from the curve fitting of Fig. 4,  $\kappa=0.154\text{meV/deg}^2$ . Take into account these parameters above, we obtain:

$$\sigma = \sqrt{\langle\theta^2\rangle - \langle\theta\rangle^2} = \sqrt{\frac{kT}{\kappa}} = 12.96\text{deg}.$$
